# Supplementary material
Source: bioRxiv or medRxiv preprint supplement (https://medrxiv.org/highwire/filestream/78274/field_highwire_adjunct_files/0/2020.04.24.20074179-1.pdf)
Supplement: Supplementary file [file 2020.04.24.20074179-1.pdf]

# ***Liver Chemistries in Patients with Severe or Non-severe COVID-19: A Meta-Analysis***

**Short title:** Liver Chemistries in COVID-19

Xuan Dong<sup>1,2\*</sup>, Dan-Yi Zeng<sup>2\*</sup>, Yan-Yan Cai<sup>1\*</sup>, Wei-Ming Chen<sup>2</sup>, Qing-Qing Xing<sup>1</sup>,  
Yan-Dan Ren<sup>3</sup>, Mei-Zhu Hong<sup>4†</sup>, and Jin-Shui Pan<sup>1,2†</sup>

<sup>1</sup>Liver Research Center, the First Affiliated Hospital of Fujian Medical University,  
Fuzhou, Fujian, China;

<sup>2</sup>School of Medicine, Xiamen University, Xiamen, Fujian, China;

<sup>3</sup>Department of Gastroenterology, Zhongshan Hospital Affiliated to Xiamen  
University, Xiamen, Fujian, China;

<sup>4</sup>Department of Traditional Chinese Medicine, Zhongshan Hospital Affiliated to  
Xiamen University, Xiamen, Fujian, China

## Searching PubMed

|                     |                     |                                                                          |                        |          |
|---------------------|---------------------|--------------------------------------------------------------------------|------------------------|----------|
| <a href="#">#26</a> | <a href="#">Add</a> | Search #25 AND #13 Filters: Publication date from 2019/12/01             | <a href="#">408</a>    | 09:54:31 |
| <a href="#">#25</a> | <a href="#">Add</a> | Search #22 OR #23 OR #24 Filters: Publication date from 2019/12/01       | <a href="#">26789</a>  | 09:47:28 |
| <a href="#">#24</a> | <a href="#">Add</a> | Search gastrointestinal[Title] Filters: Publication date from 2019/12/01 | <a href="#">1612</a>   | 09:46:53 |
| <a href="#">#23</a> | <a href="#">Add</a> | Search clinical[Title] Filters: Publication date from 2019/12/01         | <a href="#">19142</a>  | 09:46:31 |
| <a href="#">#22</a> | <a href="#">Add</a> | Search liver[Title] Filters: Publication date from 2019/12/01            | <a href="#">6365</a>   | 09:44:28 |
| <a href="#">#18</a> | <a href="#">Add</a> | Search #17 AND #13 Filters: Publication date from 2019/12/01             | <a href="#">1674</a>   | 09:43:36 |
| <a href="#">#17</a> | <a href="#">Add</a> | Search #14 OR #15 OR #16 Filters: Publication date from 2019/12/01       | <a href="#">169835</a> | 09:36:39 |
| <a href="#">#16</a> | <a href="#">Add</a> | Search gastrointestinal Filters: Publication date from 2019/12/01        | <a href="#">9629</a>   | 09:35:59 |
| <a href="#">#15</a> | <a href="#">Add</a> | Search liver Filters: Publication date from 2019/12/01                   | <a href="#">19417</a>  | 09:35:44 |
| <a href="#">#14</a> | <a href="#">Add</a> | Search Clinical Filters: Publication date from 2019/12/01                | <a href="#">151493</a> | 09:35:33 |
| <a href="#">#13</a> | <a href="#">Add</a> | Search #8 OR #9 OR #11 OR #10 Filters: Publication date from 2019/12/01  | <a href="#">5496</a>   | 09:34:53 |
| <a href="#">#12</a> | <a href="#">Add</a> | Search #8 OR #9 OR #11 OR #10                                            | <a href="#">20106</a>  | 09:30:36 |
| <a href="#">#11</a> | <a href="#">Add</a> | Search novel coronavirus                                                 | <a href="#">2940</a>   | 09:29:09 |
| <a href="#">#10</a> | <a href="#">Add</a> | Search SARS-CoV-2                                                        | <a href="#">2007</a>   | 09:28:40 |
| <a href="#">#9</a>  | <a href="#">Add</a> | Search COVID-19                                                          | <a href="#">4815</a>   | 09:28:19 |
| <a href="#">#8</a>  | <a href="#">Add</a> | Search coronavirus                                                       | <a href="#">18056</a>  | 09:28:01 |
